# Supplementary material
Source: publisher figshare collection journal article supplement (https://frontiersin.figshare.com/ndownloader/files/37685580)
Supplement: Supplementary file 1 [file 37685580]

## Sheet: Supplementary
		Year	Trial evaluating:	Pontoon trap	Time period	Catch rate > 35 cm	Catch rate > 35 cm	Catch rate < 35 cm	Catch rate < 35 cm
					(m)	WPUE (kg/day ± SE)	95% CI	WPUE (kg/day ± SE)	95% CI
		2015	Leader net meshsize	60 mm trap	Same	3.41 ± 8.66	-38.52, 45.33	-0.17 ± 0.37	-0.03, 0.03
				100 mm trap	Same	50.20 ± 8.66	8.28, 92.14
				100 mm trap	Entire	26.69 ± 7.89	1.31, 52.07	0.64 ± 0.24	-0.02, 1.30
		2016	Position of the fish chamber	Floating fish chamber (8 m trap)	Same	0.71 ± 1.34	-2.44, 3.86	0.0003 ± 0.01	-0.03, 0.03
				Bottom set fish chamber (3 m trap)	Same	4.48 ± 1.34	1.31, 7.65
				Bottom set fish chamber (3 m trap)	Entire	4.21 ± 1.10	1.75, 6.66	0.04 ± 0.01	0.01, 0.07
		2017/2018	Difference in leader net length	100 m leader net	Entire	2.83 ± 0.93	0.02, 5.65	0.06 ± 0.07	-0.16, 0.28
				200 m leader net	Entire	4.12 ± 0.88	1.13, 7.11	0.04 ± 0.06	-0.20, 0.27
			Catch rate comparison	Pontoon trap		6.30 ± 42.76	-85.53, 98.13
				Gillnets		159.78 ± 39.61	71.26, 248.29
